# Supplementary material for: Diphenyl Diselenide-Assisted Radical Addition Reaction of Diphenyl Disulfide to Unsaturated Bonds upon Photoirradiation
Source: MDPI journal article supplement (doi:10.3390/molecules28062450), 2023-03-07

Supplementary Materials

# Diphenyl Diselenide-Assisted Radical Addition Reaction of Diphenyl Disulfide to Unsaturated Bonds upon Photoirradiation

Yuki Yamamoto<sup>1</sup>, Qiqi Chen<sup>2</sup>, and Akiya Ogawa<sup>1,2, \*</sup>

1. Department of Applied Chemistry, Graduate School of Engineering, Osaka Prefecture University, Osaka 599-8531, Japan; syb02137@st.osakafu-u.ac.jp (Y.Y.)

2. Department of Applied Chemistry, Graduate School of Engineering, Osaka Metropolitan University, Osaka 599-8531, Japan; sc22033n@st.omu.ac.jp (Q. C.)

\* Correspondence: ogawa@omu.ac.jp

## Contents

Copies of <sup>1</sup>H and <sup>13</sup>C{<sup>1</sup>H} NMR spectra ···2–6

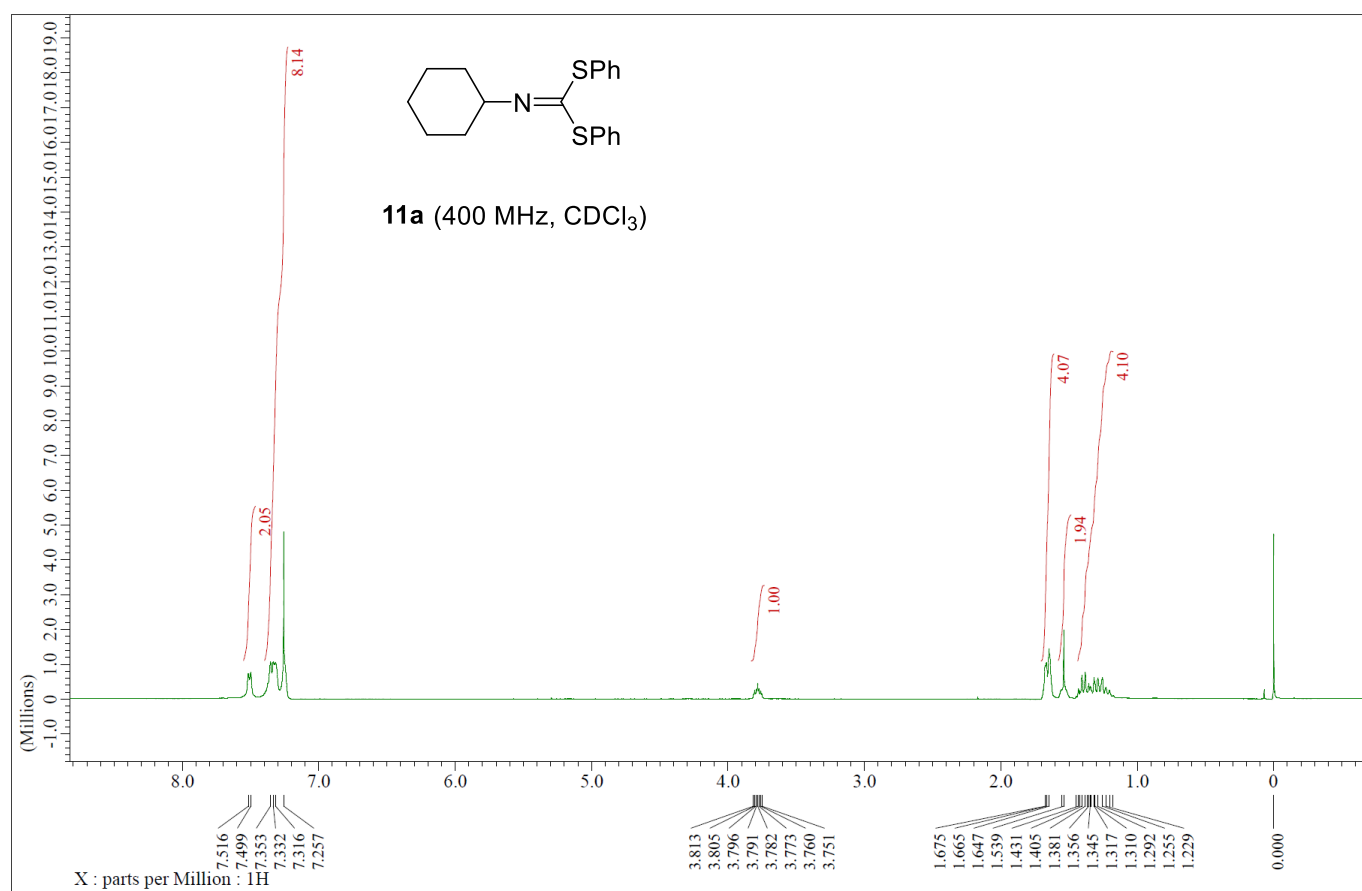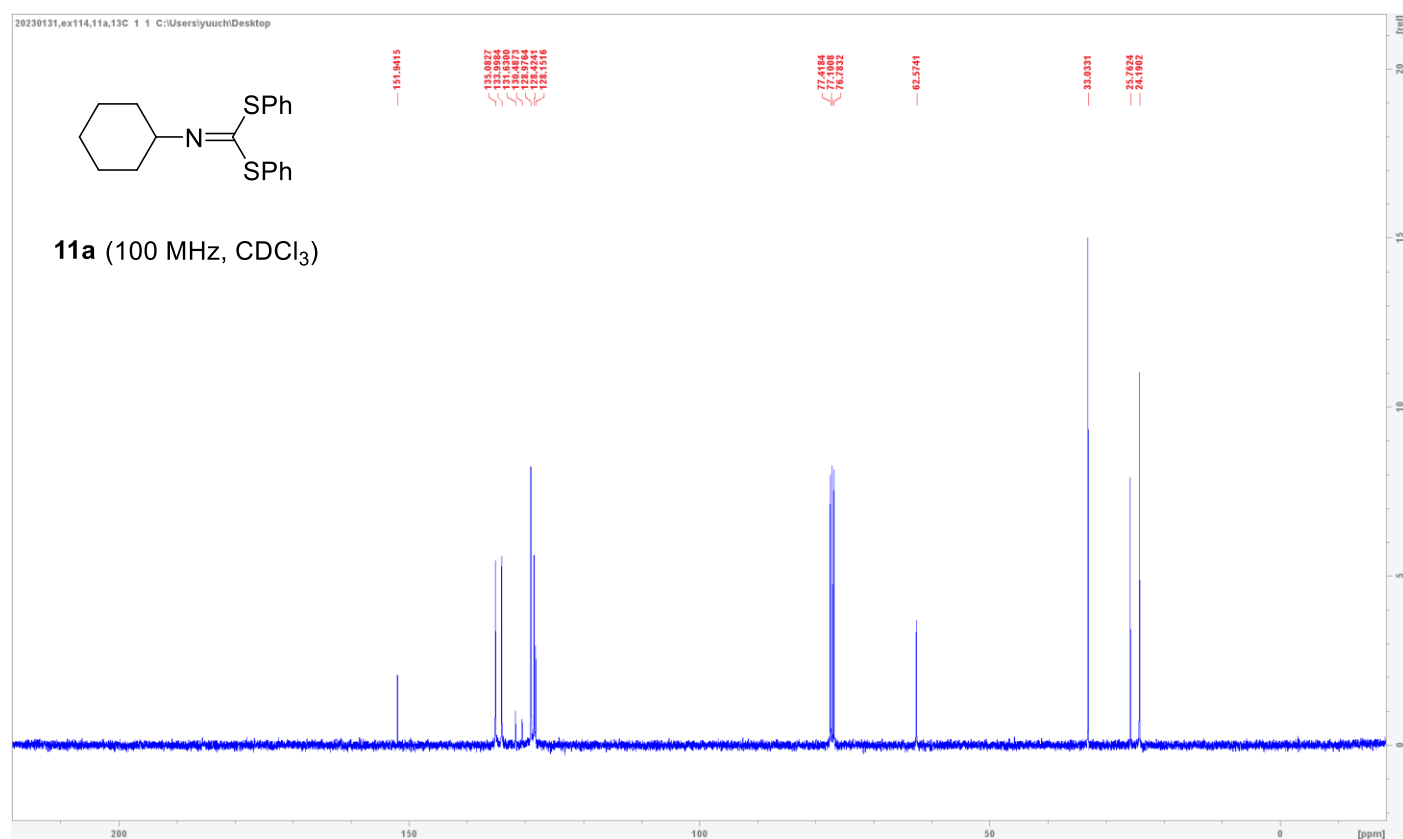

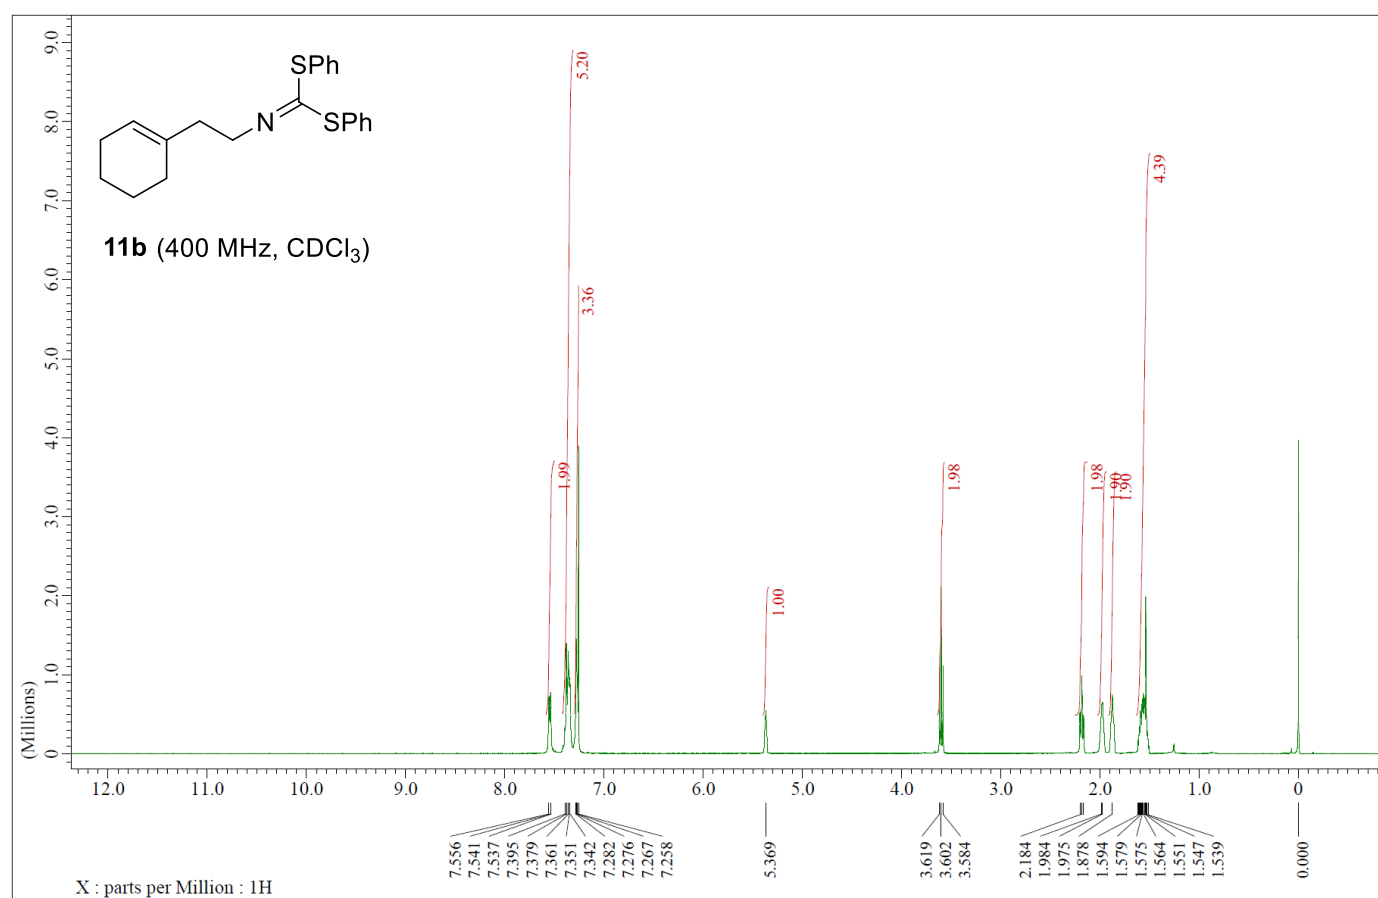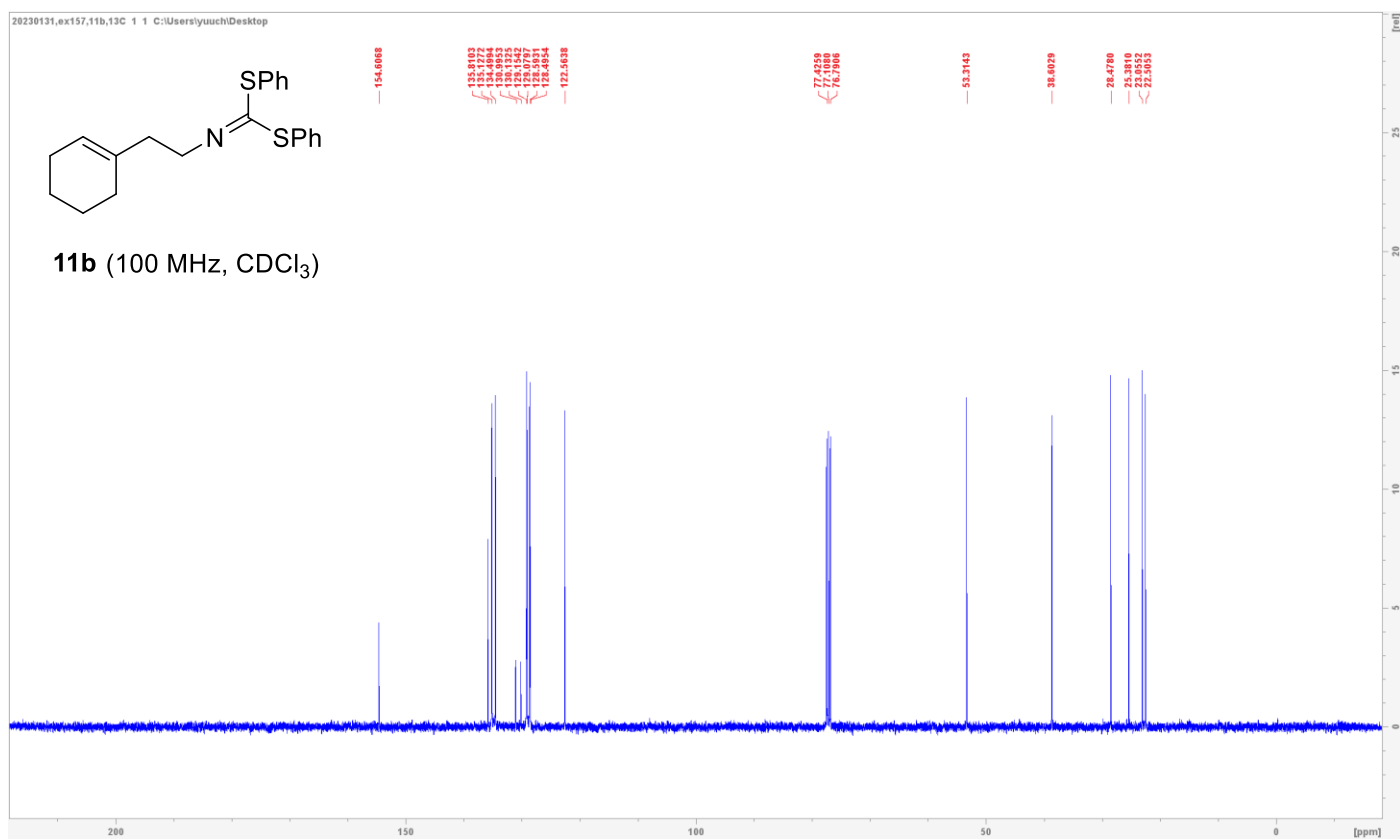

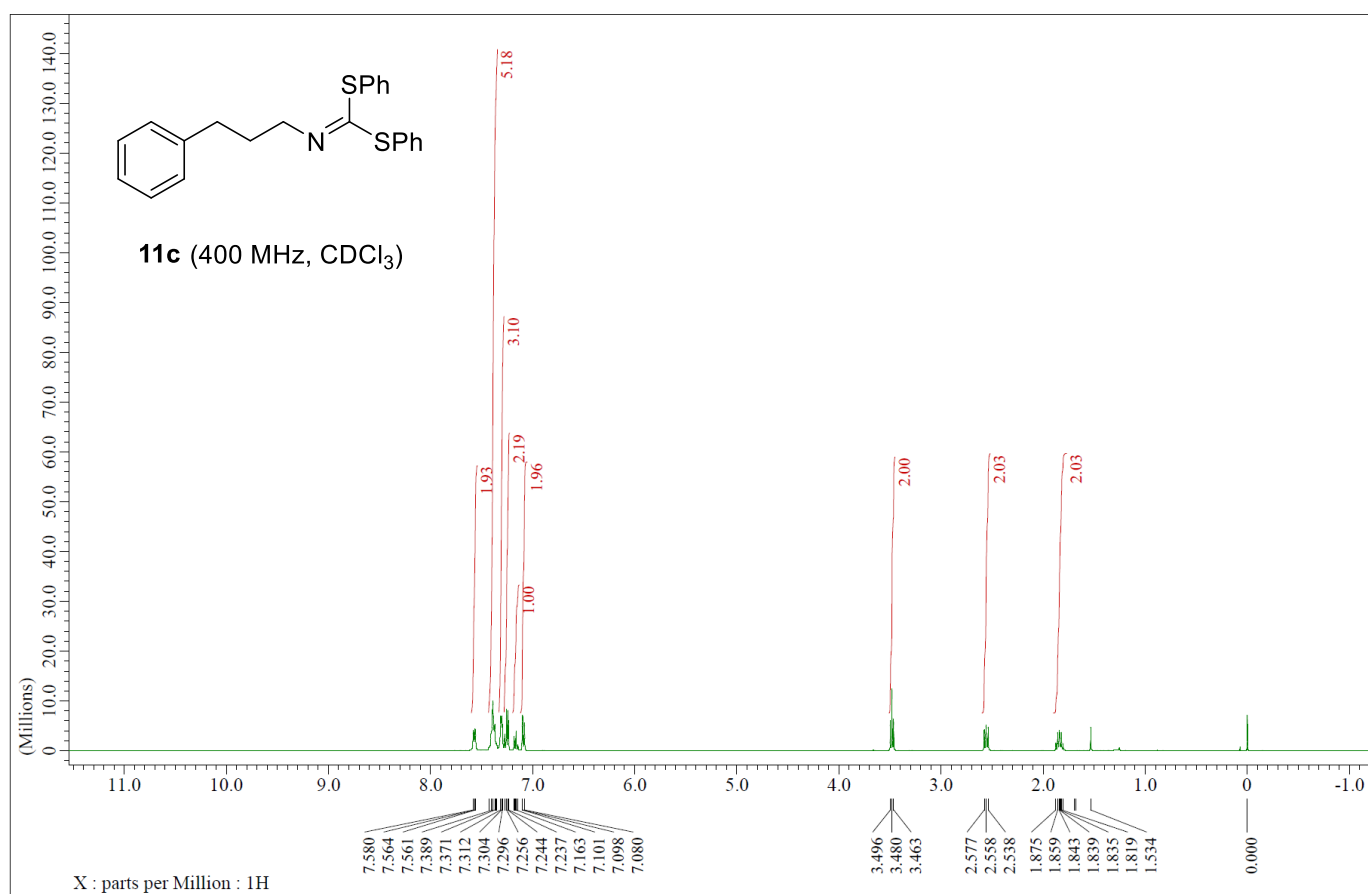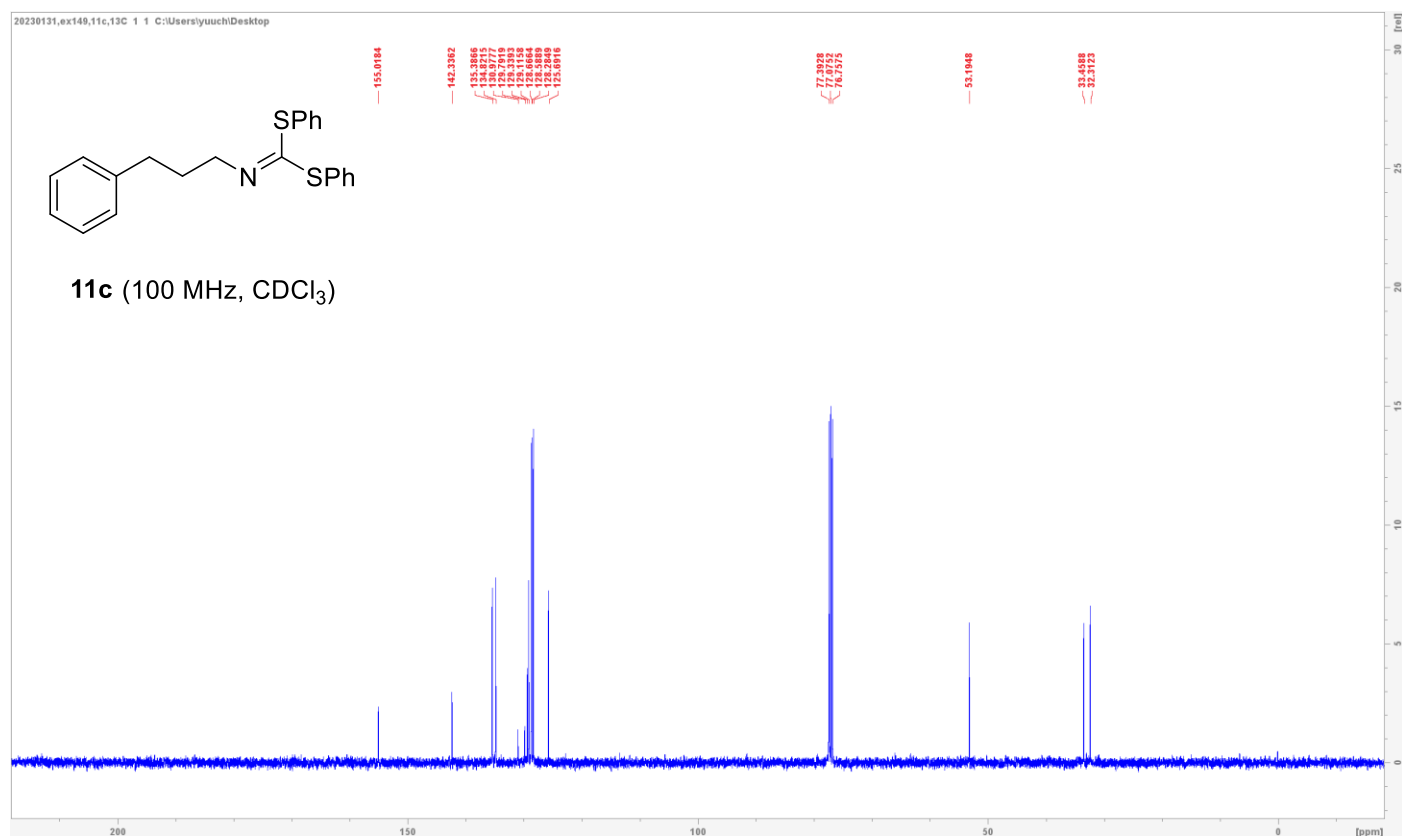

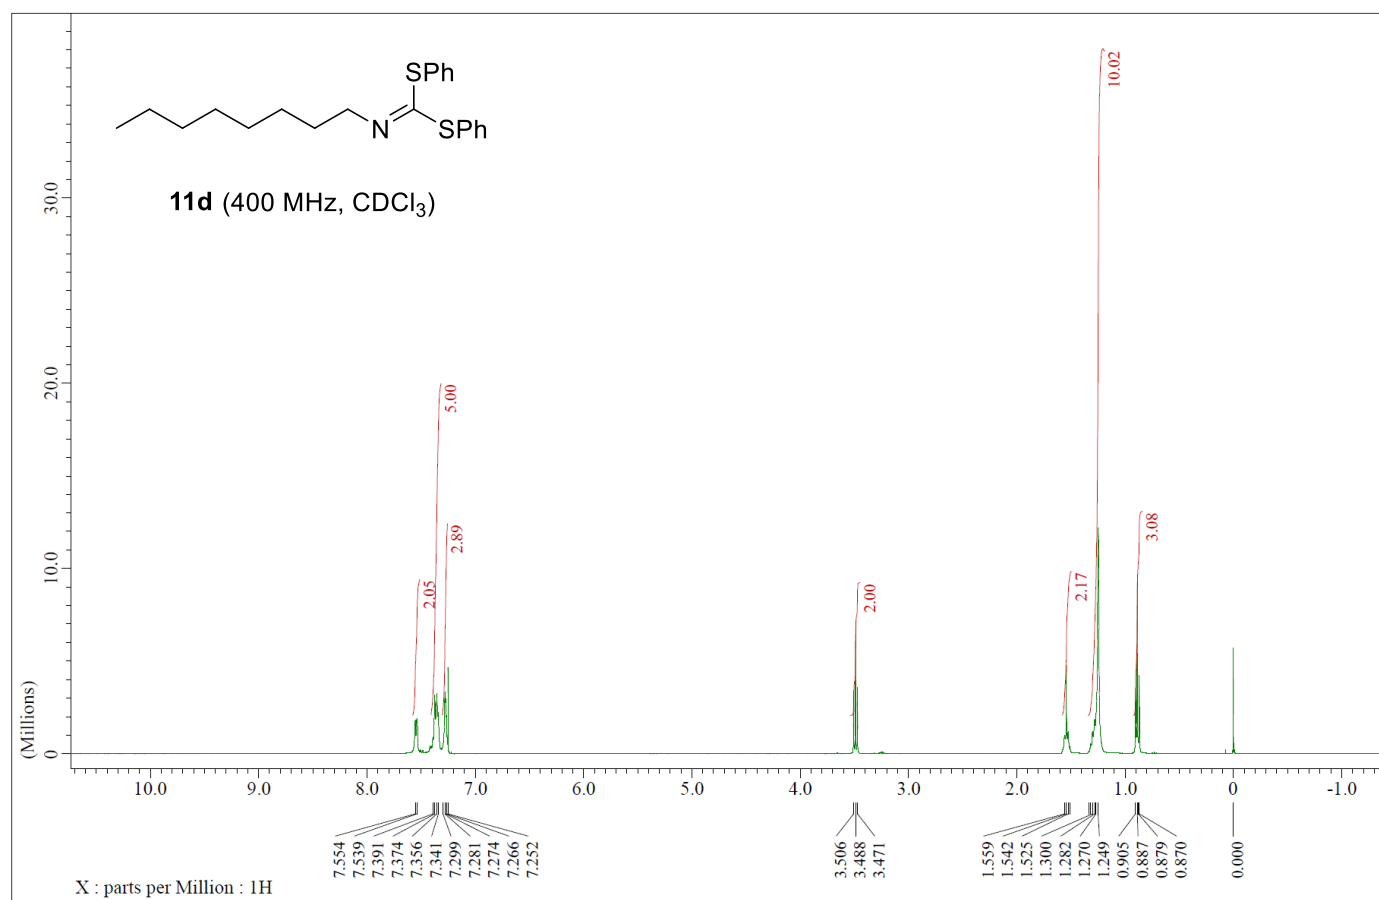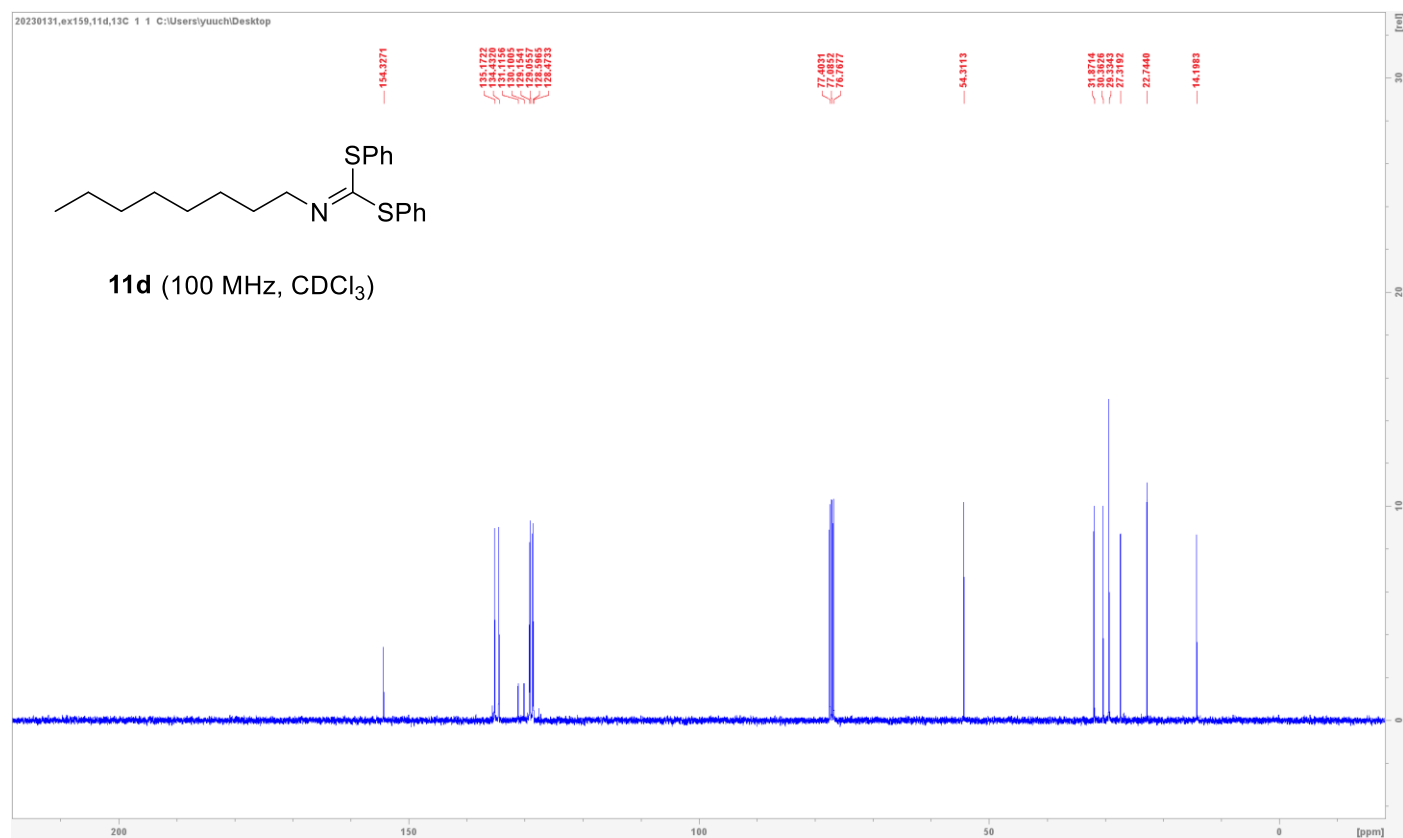

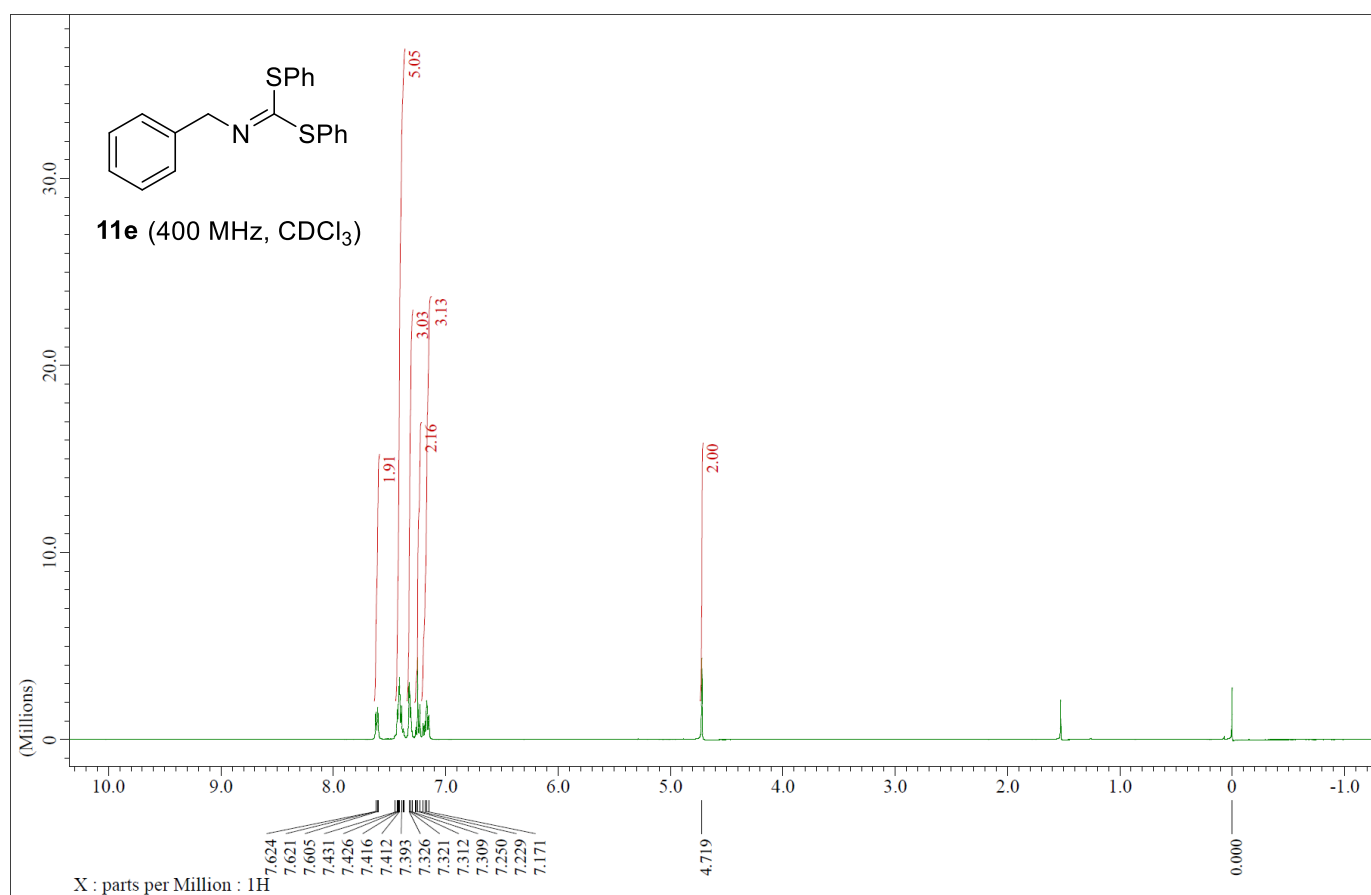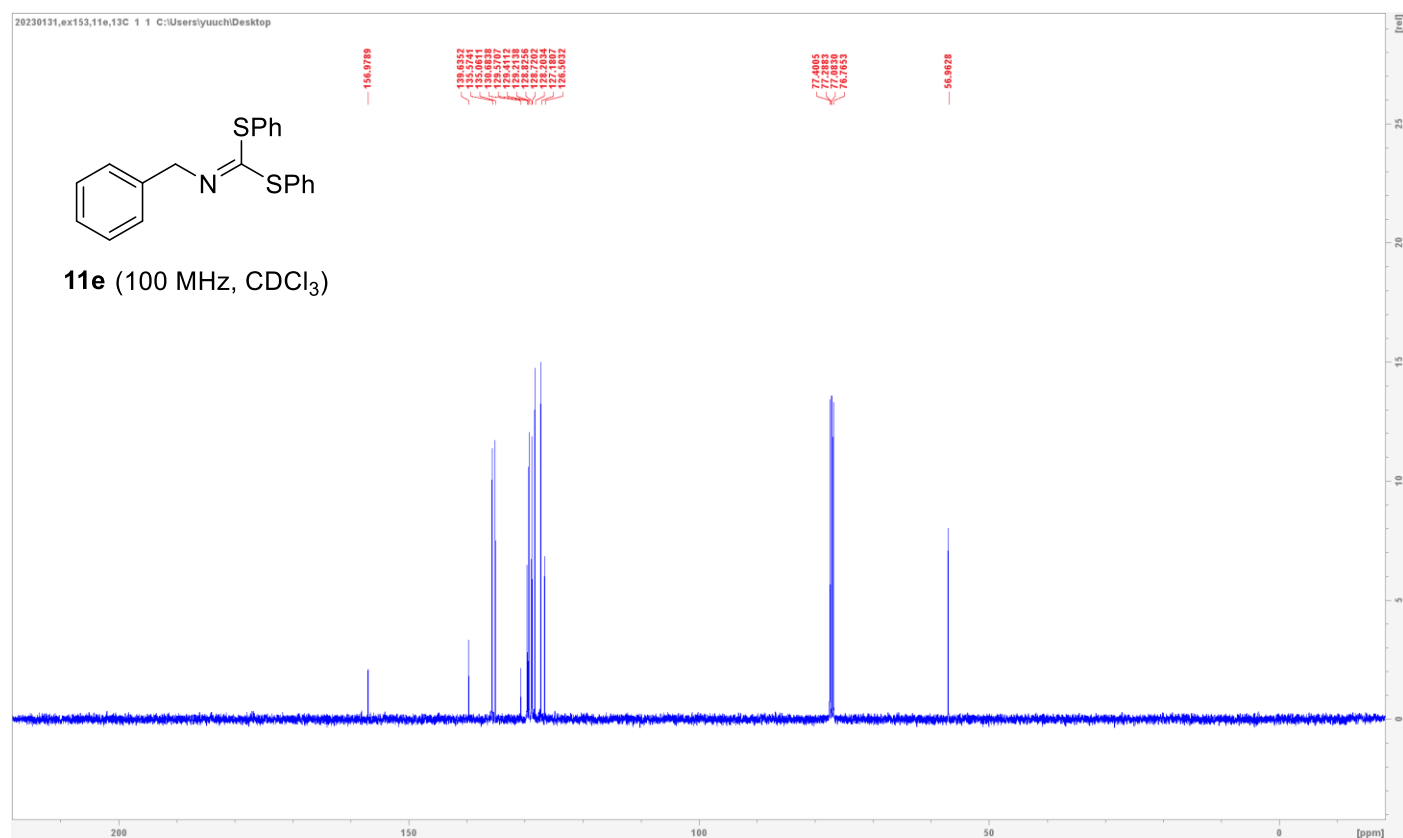

Supplement: s1 [file s1]
